# Supplementary material for: Dafachronic acid and temperature regulate canonical dauer pathways during Nippostrongylus brasiliensis infectious larvae activation
Source: PubMed Central journal article supplement (PMC7110753; doi:10.1186/s13071-020-04035-z), 2020-04-01
Supplement: 13071_2020_4035_MOESM11_ESM.pdf [file 13071_2020_4035_MOESM11_ESM.pdf]

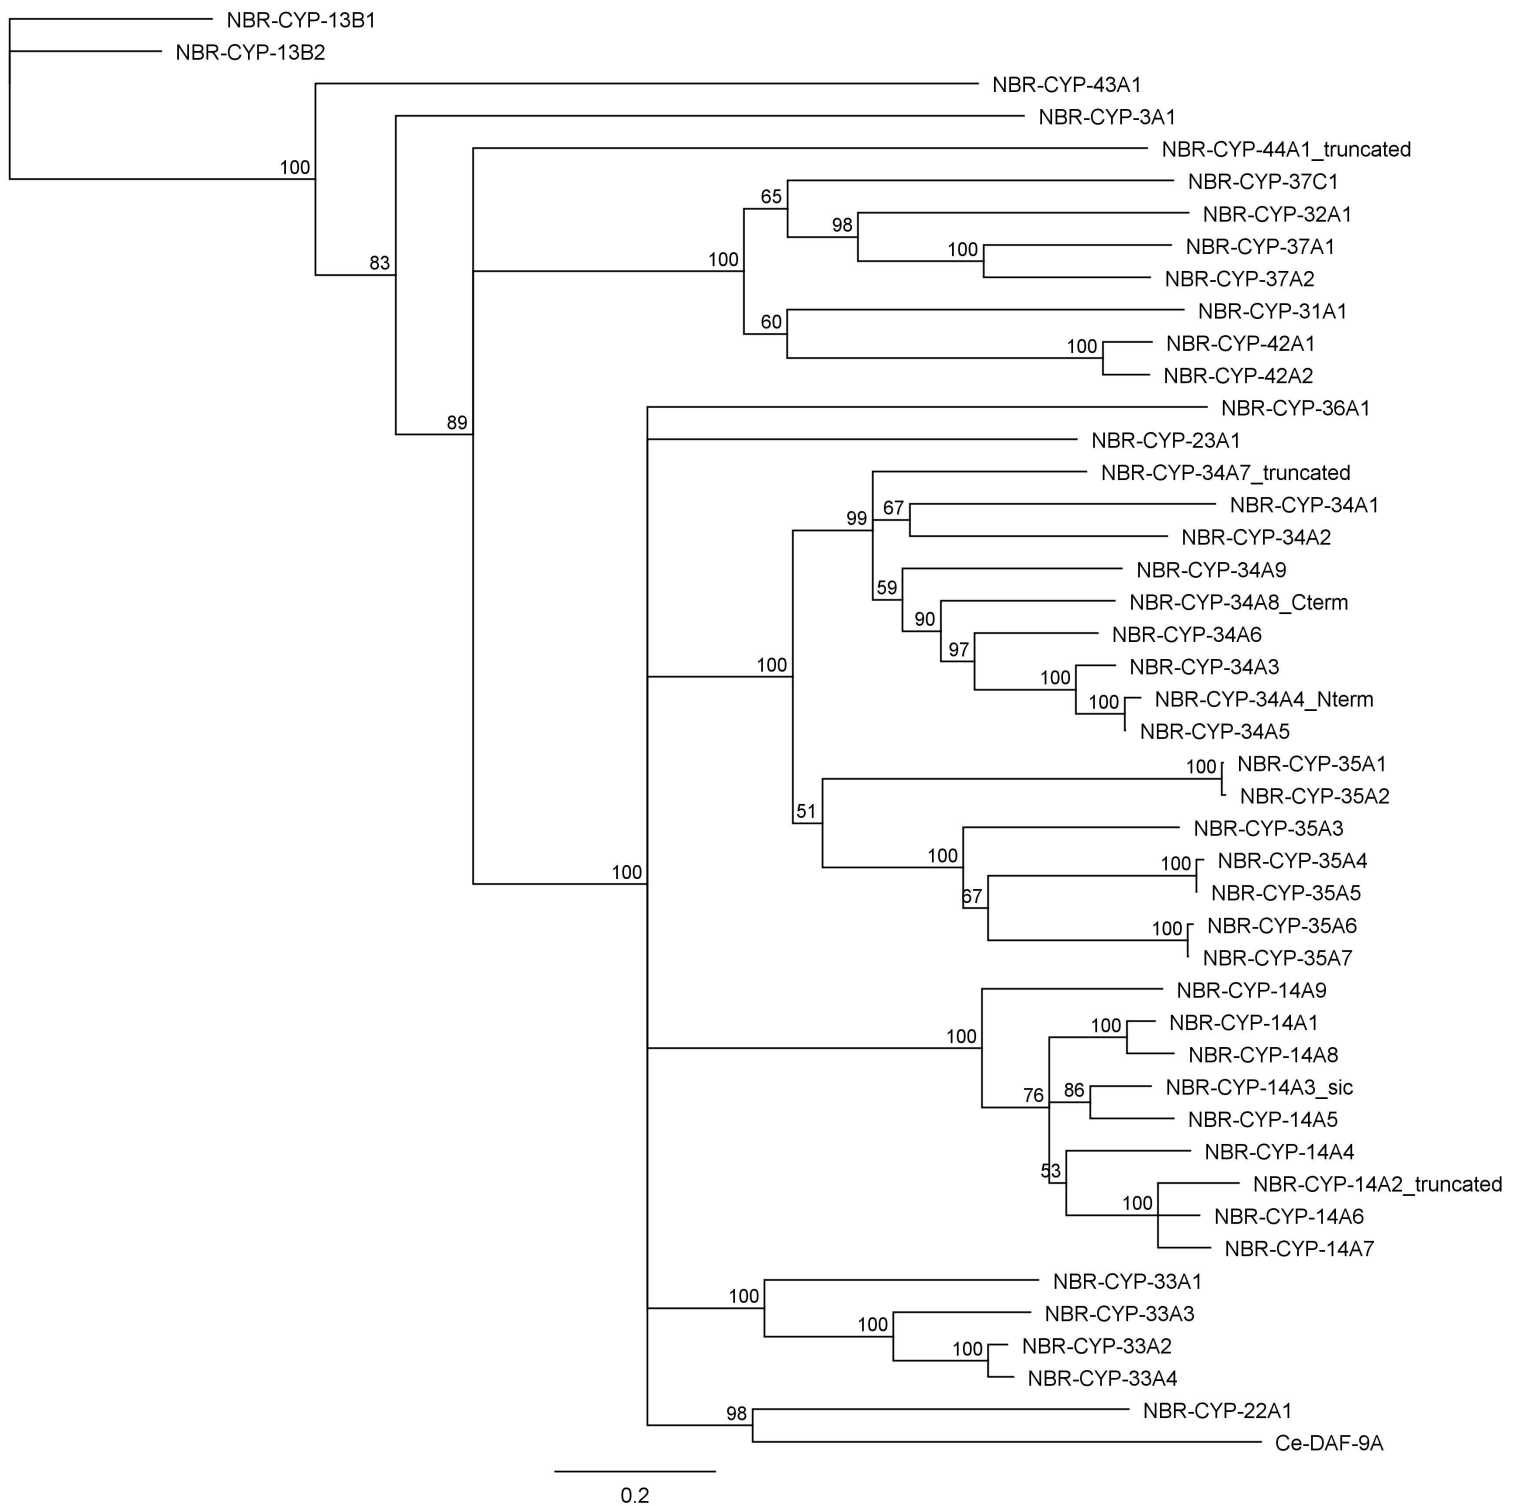

**Figure S3. *Nbr-CYP-22A1* groups with *Cel-DAF-9* by phylogenetic analysis.**

*N. brasiliensis* transcripts predicted to encode polypeptides with a cytochrome P450 domain were translated; predicted protein sequences were aligned, along with *C. elegans* DAF-9A, using ClustalW. A neighbor-joining phylogenetic tree was constructed with 100 iterations of bootstrapping. *Nbr-CYP-22A1* grouped most closely with *Cel-DAF-9*. Scale bar represents number of substitutions per position.
